# Supplementary material for: Symbiotic bacteria of the gall-inducing mite Fragariocoptes setiger (Eriophyoidea) and phylogenomic resolution of the eriophyoid position among Acari
Source: PubMed Central journal article supplement (PMC8907322; doi:10.1038/s41598-022-07535-3), 2022-03-09

**Supplementary Fig. S1. Taxonomic classification of Bacteria in two metagenomic of the gall-inducing mite *Fragariocoptes setiger* in Kraken2.** There was a total of 49,514,852 and 3,830,185 classified bacterial reads in samples 1 and 2, respectively. OTUs (genera) were filtered based on a normalized abundance threshold of  $\geq 0.0338\%$  in either sample, resulting in 83 OTUs (genera) represented by 46,906,755 and 1,895,438 reads (sample 1 and 2, respectively). Data are given in Supplementary Table S2.

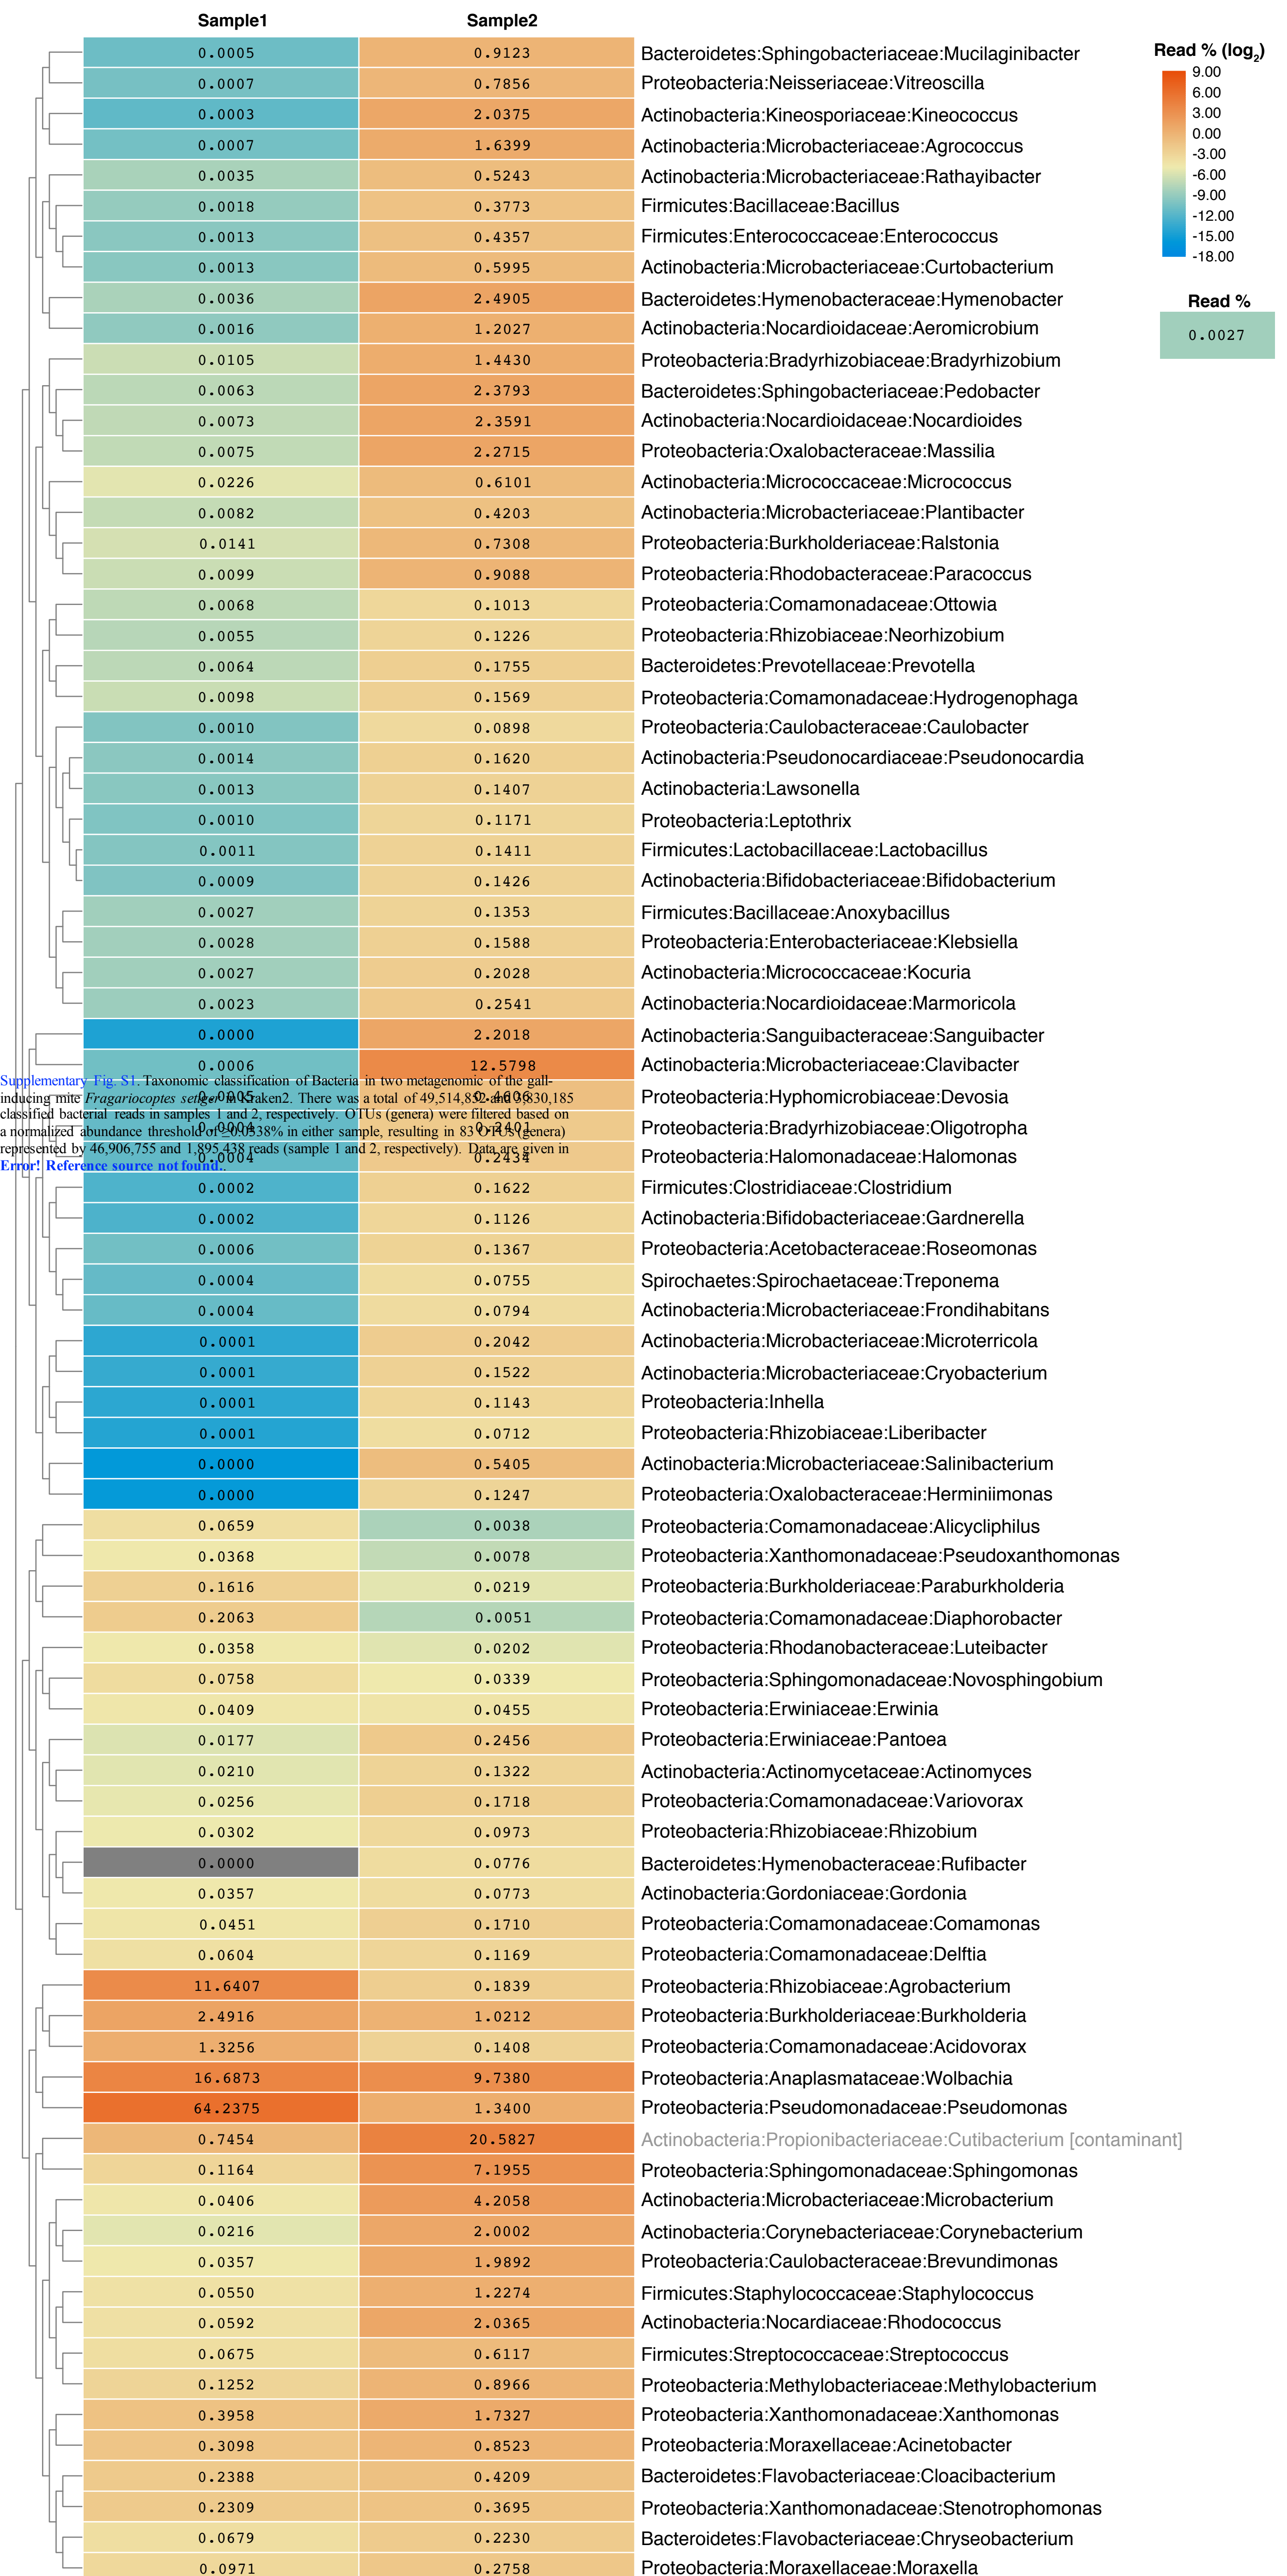

Supplement: 41598_2022_7535_MOESM2_ESM.pdf [file 41598_2022_7535_MOESM2_ESM.pdf]
