# Supplementary material for: Symbiotic bacteria of the gall-inducing mite Fragariocoptes setiger (Eriophyoidea) and phylogenomic resolution of the eriophyoid position among Acari
Source: PubMed Central journal article supplement (PMC8907322; doi:10.1038/s41598-022-07535-3), 2022-03-09

**Supplementary Fig. S2. Taxonomic classification of two metagenomic samples of the gall-inducing mite *Fragariocoptes setiger* in Kraken2.** There was a total of 708,046,814 and 82,009,061 classified reads in samples 1 and 2, respectively. OTUs (genera) were filtered based on a normalized abundance threshold of  $\geq 0.0005\%$  in either sample, resulting in 171 OTUs represented by 670,717,361 and 72,439,919 reads (sample 1 and 2, respectively). Data are given in Supplementary Table S3.

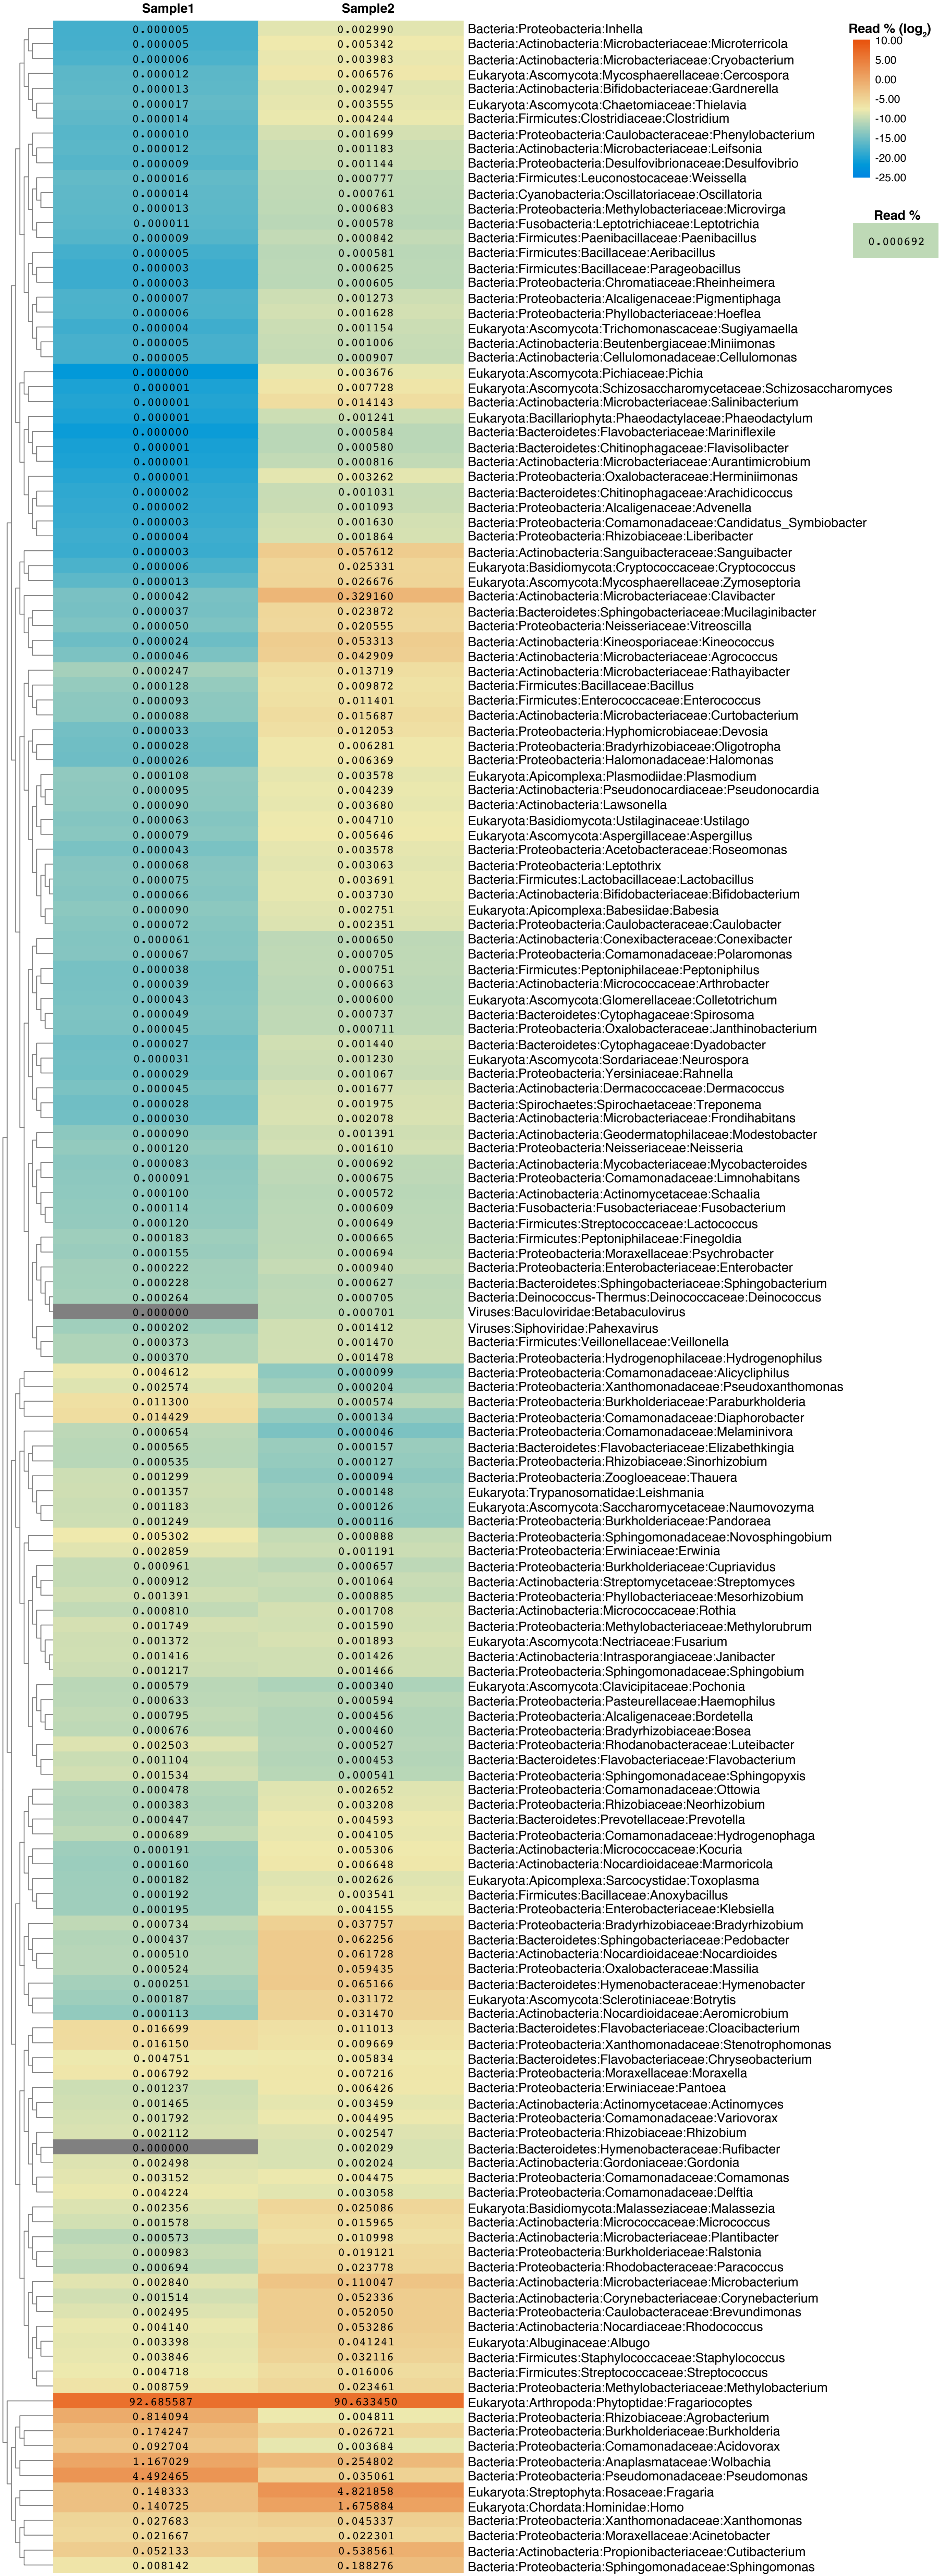

Supplement: 41598_2022_7535_MOESM3_ESM.pdf [file 41598_2022_7535_MOESM3_ESM.pdf]
